# Supplementary material for: Structure of the Toll/Interleukin-1 Receptor (TIR) Domain of the B-cell Adaptor That Links Phosphoinositide Metabolism with the Negative Regulation of the Toll-like Receptor (TLR) Signalosome
Source: PubMed Central journal article supplement (PMC5241739; doi:10.1074/jbc.m116.761528), 2016-12-01
Supplement: 10.1074_M116.761528_jbc.M116.761528-1.pdf [file 10.1074_M116.761528_jbc.M116.761528-1.pdf]

SUPPLEMENTARY MATERIALS

Supplementary Table S1: Crystallographic Statistics for the N-terminal TIR domain of human BCAP

| <b>BCAP-TIR (I3C)</b>                               |               |
|-----------------------------------------------------|---------------|
| <b>Data Collection</b>                              |               |
| Space group                                         | P62 2 2       |
| Cell dimensions                                     |               |
| <i>a</i> = <i>b</i> , <i>c</i> (Å)                  | 135.04, 42.91 |
| Resolution (Å)                                      | 44.2–2.5      |
| Total reflections                                   | 99543 (9785)  |
| Unique reflections                                  | 15066 (1489)  |
| <i>I</i> / $\sigma$ <i>I</i>                        | 24.8(7.2)     |
| Completeness (%)                                    | 99(98)        |
| Redundancy                                          | 6.6(6.6)      |
| Wilson B-factor                                     | 53.84         |
| R-merge                                             | 0.047 (0.24)  |
| R-meas                                              | 0.051 (0.26)  |
| CC1/2                                               | 0.99 (0.98)   |
| CC*                                                 | 1.0 (1.0)     |
| Phaser-EP FOM                                       | 0.35          |
| <b>Refinement</b>                                   |               |
| No. reflections                                     | 15066 (1489)  |
| <i>R</i> <sub>work</sub> / <i>R</i> <sub>free</sub> | 0.19/0.24     |
| No. atoms                                           |               |
| Protein                                             | 1088          |
| Ligands                                             | 32            |
| Avg. <i>B</i> -factor                               | 59.7          |
| R.m.s. deviations                                   |               |
| Bond lengths (Å)                                    | 0.012         |
| Bond angles (Degrees)                               | 1.60          |
| <b>Validation</b>                                   |               |
| Ramachandran favoured/allowed (%)                   | 96/100        |
| Rotamer Outliers (%)                                | 7.8           |
| Clashscore                                          | 7.7           |

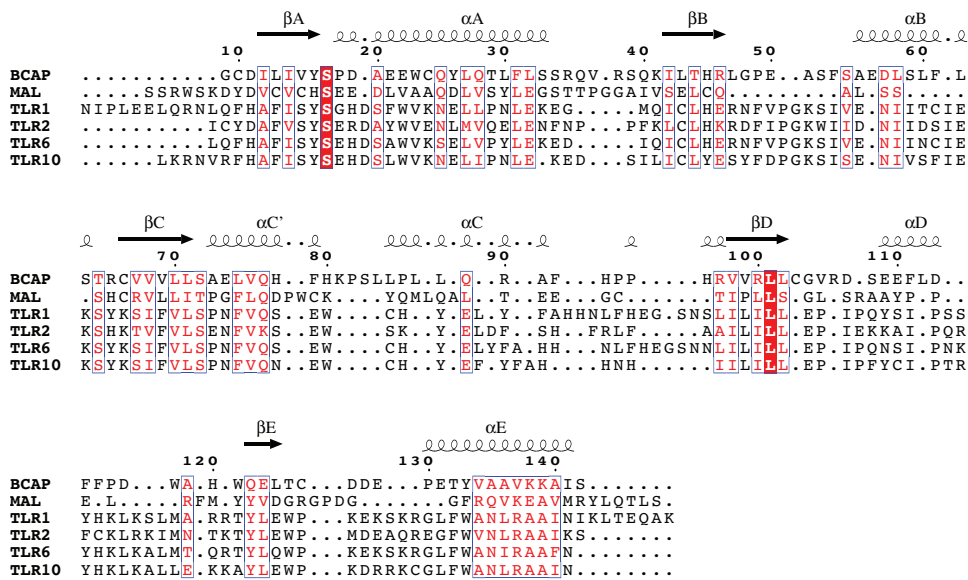

Supplementary Fig. S1: Structural alignment of the BCAP-TIR and the TIR-domains of MAL (2y92), TLR1 (1fyv), TLR2 (1o77), TLR6 (4om7) and TLR10 (2j67). The secondary structural elements shown are those of the BCAP-TIR domain (5for).

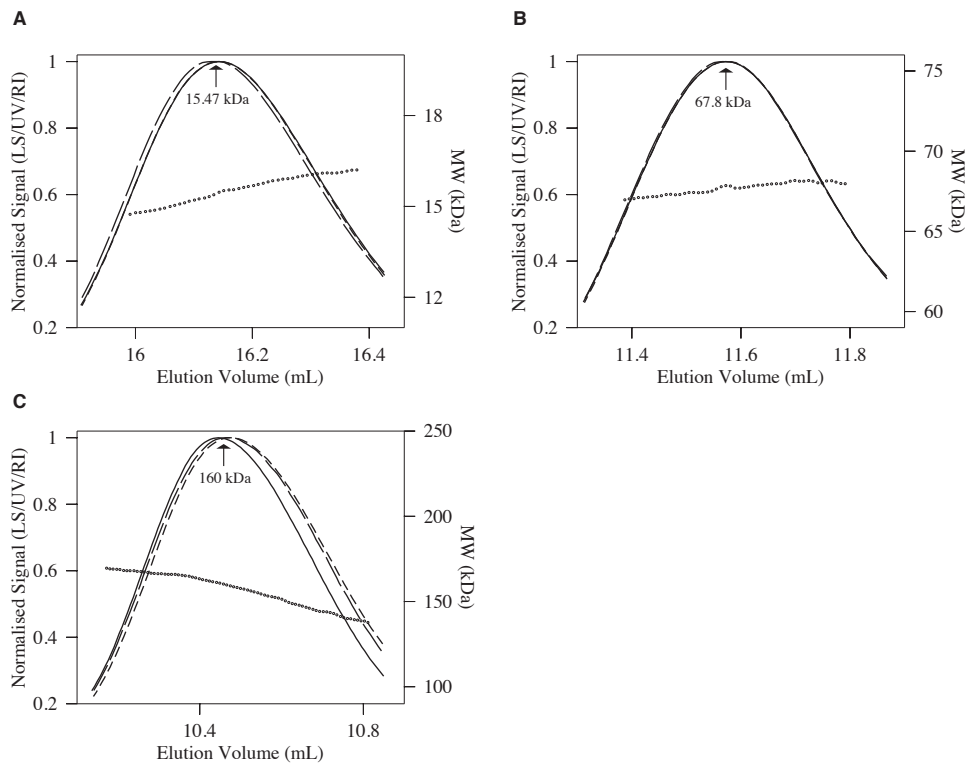

Supplementary Fig. S2: Size exclusion chromatography in combination with multi-angle light scattering (SEC-MALS) and differential refractometry data for the N-terminal TIR domain of BCAP (A), BCAP<sub>330</sub> (B) and BCAP<sub>L</sub> (C). Plots show the normalised UV (280 nm) light scattering, refractive index and weight-averaged molecular mass (MW) variation across the peak in addition to the MW at the peak. The molecular weights obtained by SEC-MALS are in complete agreement with those obtained by sedimentation velocity.)

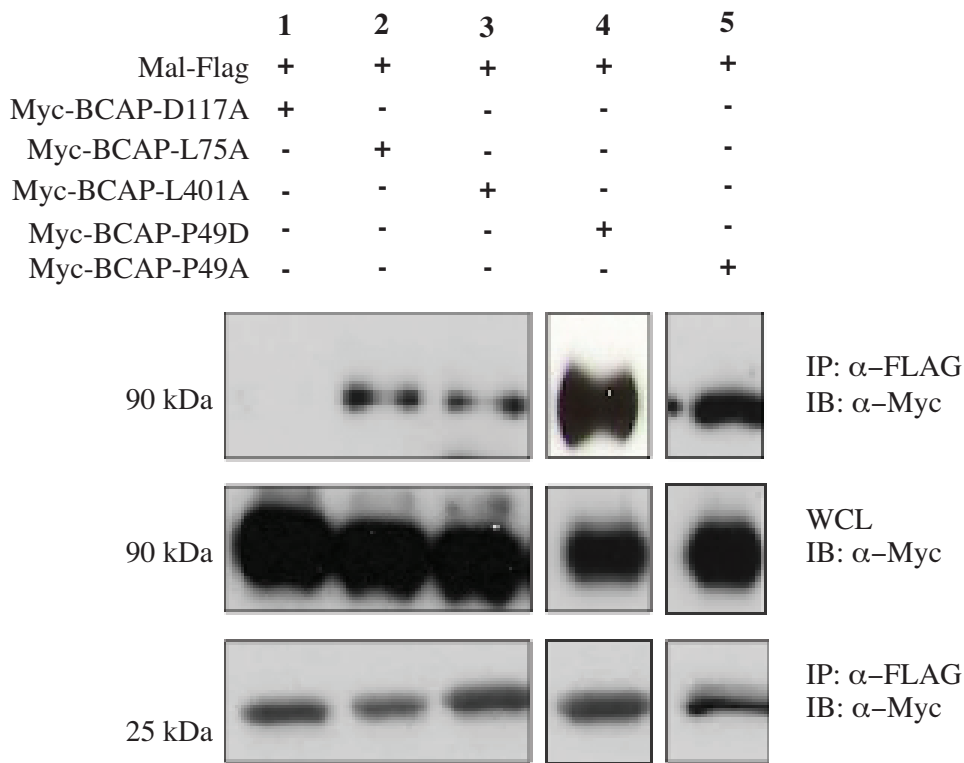

Supplementary Fig. S3: The highly conserved proline residue (P49) in the  $\beta$ B-loop of BCAP is not required for Mal/TIRAP interaction. HEK293T cells were transfected with FLAG-Mal, Myc-Mal and Myc-BCAP as described. Both  $\beta$ B loop proline mutations (P49A/P49D) allowed the BCAP-Mal/TIRAP interaction (lanes 4–5) to occur. Mutations in the  $\alpha$ C' helix (L75A) and outside the TIR domain (L401A) both exhibit reduced interaction with Mal/TIRAP (lanes 2–3) while the D117A (lane 1) mutation which lies in the region connecting the  $\alpha$ D helix and  $\beta$ D strand completely abolishes the BCAP and Mal/TIRAP interaction.

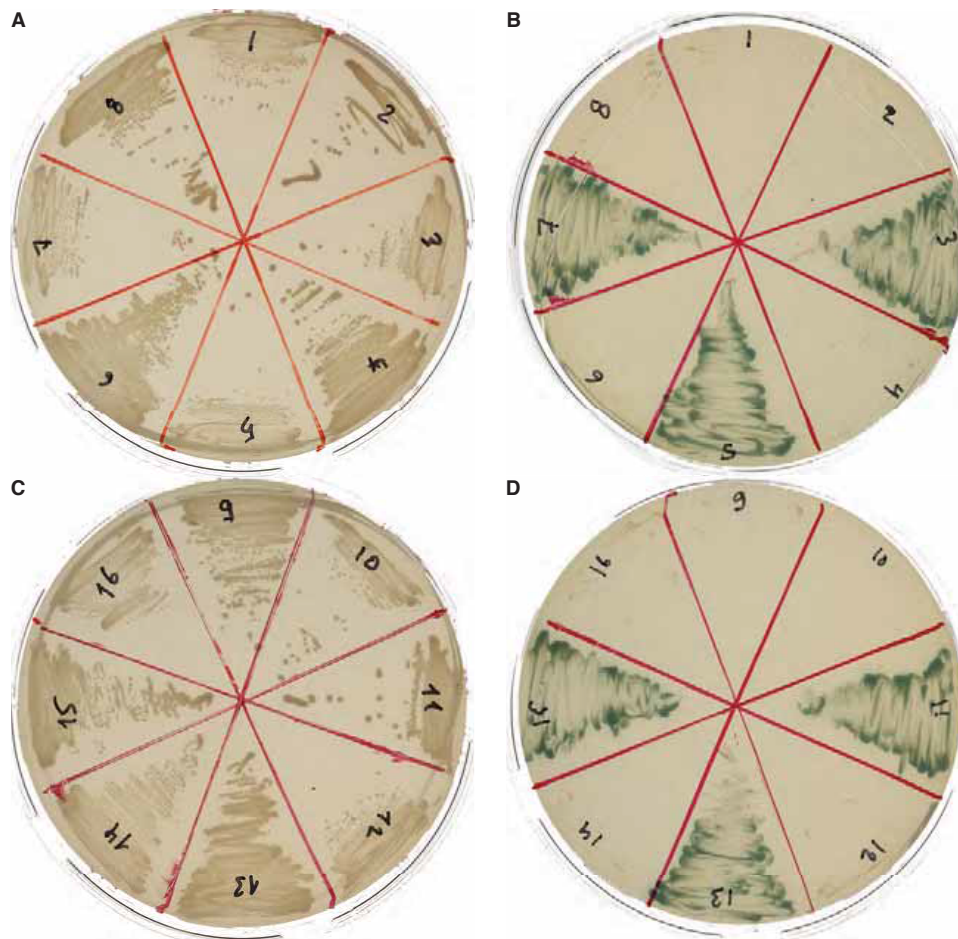

Supplementary Fig. S4: Interaction of BCAP-TDA and various TIR domain containing proteins determined by Yeast two-hybrid. Panels (A) and (C) were used to assess transformation and mating efficiency on SD/-Trp/-Leu media. BCAP-TDA interacts with wild-type MAL/TIRAP and its mutants D96N and S180L (3, 5 and 7)(B) and with the TIR domains of TLR2 and TLR4 (D) (11 and 13) respectively on SD/-Trp/-Leu/-His/-Ade/+X- $\alpha$ -Gal+5mM 3-AT. The full matrix of the prey and bait plasmids used are shown below.

|                  | pGADT7 | pGADT7[TIRAP] | pGADT7[D96N] | pGADT7[S180L] |
|------------------|--------|---------------|--------------|---------------|
| pGBKT7[BCAP-TDA] | 1      | 3             | 5            | 7             |
| pGBKT7           | 2      | 4             | 6            | 8             |
|                  | pGADT7 | pGADT7[TLR2]  | pGADT7[TLR4] | pGADT7[TIRAP] |
| pGBKT7[BCAP-TDA] | 9      | 11            | 13           | 15            |
| pGBKT7           | 10     | 12            | 14           | 16            |

Supplementary Table S2: Plasmids and primers used for protein expression in bacteria, yeast and human cells. The restriction sites used, when relevant are shown.

| Protein                    | Oligonucleotide Sequence (5' → 3')                                                          | Vector    |
|----------------------------|---------------------------------------------------------------------------------------------|-----------|
| BCAP-TIR(F)                | TACTTCCAATCCAATGCCCCAGAGGATGCGACATCCTCATC                                                   | pMCSG7    |
| BCAP-TIR(R)                | TTATCCACTTCCAATGTTAGGAAATGGCTTTTTTTCACAGCTGCCAC                                             |           |
| BCAP <sub>5</sub> (F)      | TACTTCCAATCCAATGCCATGGTGGTGCAGCCGGACCG                                                      | pMCSG7    |
| BCAP <sub>L/S</sub> (R)    | TTATCCACTTCCAATGTTACTTCTCGAACTGGGGGTGACTC<br>CAGCGTCCTCTGGGTGG                              | pMCSG7    |
| BCAP <sub>L/330</sub> (F)  | TACTTCCAATCCAATGCCATGGCAGCCTCAGGG                                                           | pMCSG7    |
| BCAP <sub>330</sub> (R)    | TTATCCACTTCCAATGTTACTTTTTCAAACCTGCGGATGCGACCAG<br>GCACTGGCATTGTCATCATATCTTCTTCTTCCAGCTGGTTG |           |
| FLAG-BCAP <sub>L</sub> (F) | ATCAAGCTTATGGCAGCCTCAGGGGTGCC (HindIII)                                                     | pCMV10    |
| FLAG-BCAP <sub>L</sub> (R) | ATCGGATCCTCAGCGTCCTCTGGGTGGAACAGG (BamHI)                                                   |           |
| Myc-BCAP <sub>L</sub> (F)  | Same as FLAG-BCAP <sub>L</sub> (F) (HindIII)                                                | pCMV-Myc  |
| Myc-BCAP <sub>L</sub> (R)  | ATCGGTACCGCGTCCTCTGGGTGGAACAGG (KpnI)                                                       |           |
| Myc-BCAP-SV (F)            | ATCAAGCTTATGGTGGTGCAGCCGGACCG (HindIII)                                                     | pCMV-Myc  |
| Myc-BCAP-SV (R)            | ATCGGTACCGCGTCCTCTGGGTGGAACAGG (KpnI)                                                       |           |
| BCAP-TDA (F)               | ATCCATATGATGGCAGCCTCAGGGGTGCC (NdeI)                                                        | pGBKT7 AD |
| BCAP-TDA (R)               | ATCGGATCCTCACGAGCATTTTCATAAGCAGGTCTGTGG (BamHI)                                             |           |
| MAL (F)                    | ATCCATATGATGGCATCATCGACCTCCCTCCC (NdeI)                                                     | pGBKT7 AD |
| MAL (R)                    | ATCGGATCCTCAAAGTAGATCAGATACTGTAGCTGAATCCCG (BamHI)                                          |           |
| TLR2-TIR (F)               | ATCCATATGAGCAGGAACATCTGCTATGATGCATTTGTTTC (NdeI)                                            | pGBKT7 AD |
| TLR2-TIR (R)               | ATCGGATCCTCAGGACTTTATCGCAGCTCTCAGATTTACC (BamHI)                                            |           |
| TLR4-TIR (F)               | ATCCATATGGAAAACATCTATGATGCCTTTGTTATCTACTCAAG (NdeI)                                         | pGBKT7 AD |
| TLR4-TIR (R)               | TCGGATCCTCATGATTTACCATCCAGCAGGGCTTTTCTG (BamHI)                                             |           |
